# Supplementary material
Source: ML conference proceedings conference paper supplement (https://proceedings.neurips.cc/paper_files/paper/2014/hash/f670ef5d2d6bdf8f29450a970494dd64-Abstract.html)
Supplement: Supplementary file [file f670ef5d2d6bdf8f29450a970494dd64-Supplemental.zip]

# Supplementary Material

## A Proof of Prop. 2

Reflexivity ( $v \preceq_G v, \forall v \in V$ ) comes from the fact that the identity element  $1_G$  leaves any  $v$  unchanged, and therefore  $v \in Gv \subseteq \mathcal{O}_G(v)$ . To prove transitivity, it suffices to show that

$$\mathcal{O}_G(w) \subseteq \mathcal{O}_G(v) \Leftrightarrow w \preceq_G v. \quad (15)$$

The direct statement ( $\Rightarrow$ ) follows from reflexivity: since  $w \in \mathcal{O}_G(w) \subseteq \mathcal{O}_G(v)$ , this implies  $w \in \mathcal{O}_G(v)$ . For the converse statement ( $\Leftarrow$ ), note that  $w \in \mathcal{O}_G(v)$  implies that  $w = \sum_i c_i h_i v$  for  $\{h_i\} \subseteq G$  and non-negative scalars  $\{c_i\}$  that sum to one; using the linearity of the action, we then have that  $gw = \sum_i c_i gh_i v \in \mathcal{O}_G(v)$  for any  $g \in G$ , which implies  $Gw \subseteq \mathcal{O}_G(v)$  and  $\mathcal{O}_G(w) \subseteq \mathcal{O}_G(v)$  (due to convexity of  $\mathcal{O}_G(v)$ ).

## B Proof of Prop. 14

Let us start by noting that, for arbitrary  $h \in G$ ,

$$\begin{aligned} \min_{h \in G} \frac{1}{2} \|hw - a\|^2 &= \min_{h \in G} \frac{1}{2} \|hw\|^2 - \langle hw, a \rangle + \frac{1}{2} \|a\|^2 \\ &= \frac{1}{2} \|w\|^2 + \frac{1}{2} \|a\|^2 - m(w, a) \\ &= \frac{1}{2} \|w - \tilde{a}\|^2, \end{aligned} \quad (16)$$

where  $\tilde{a} \in Ga$  is such that  $m(w, a) = \langle w, \tilde{a} \rangle$ ; the optimal  $h$  satisfies  $\tilde{a} = h^{-1}a$ ; and the second step is justified by the fact that  $G$  is a subgroup of  $O(d)$ , hence its action is norm-preserving. Due to Moreau's decomposition theorem [34], we have that the projection in line 5 can be computed via proximal operator associated with  $I_{\mathcal{O}_G(v)}^* = m_G(\cdot, v)$ ; namely we have that the (unique) minimizer  $w^*$  in line 5 satisfies  $w^* = a - \text{prox}_{m_G(\cdot, v)}(a)$ . Evaluating the proximal operator boils down to solving the following problem:

$$\begin{aligned} \min_{u \in V} \frac{1}{2} \|u - a\|^2 + m_G(u, v) &= \min_{u \in K_G(a)} \frac{1}{2} \|u - a\|^2 + m_G(u, gv) \\ &= \min_{u \in K_G(gv)} \frac{1}{2} \|u - a\|^2 + \langle u, gv \rangle \\ &= \min_{u \in K_G(gv)} \frac{1}{2} \|u - (a - gv)\|^2 + \text{constant}, \end{aligned} \quad (17)$$

where we used Eq. 16 and the fact that  $gv \in K_G(a)$ . This leads to the result.

## C Proof of Convergence of the Continuation Algorithm

We show that for any  $\epsilon > 0$ , the sequence  $(L(w_1), L(w_2), \dots)$  is strictly decreasing. Convergence follows from the fact that this sequence is lower bounded by the unregularized objective value  $\min_w L(w)$ , assumed finite. The proof consists of two steps:

1. Showing that, for any  $\epsilon > 0$ ,  $w_t$  lies in the interior of  $\mathcal{O}_G(v_{t+1})$ . This follows from the fact that  $v'_t, w_t$ , and their convex combination all belong to the region cone  $K_G(w_t)$ ; in this region the pre-order induced by  $G$  is a cone ordering w.r.t. the polar cone of  $K_G$ , from which we can derive  $w_t \in \mathcal{O}_G(\alpha v'_t + (1 - \alpha)w_t)$ , leading to the desired statement.
2. Showing that  $(L(w_1), L(w_2), \dots)$  strictly decreases before the algorithm terminates. This is a simple consequence of the previous fact. Since  $w_t \in \mathcal{O}_G(v_{t+1})$ , we must have  $L(w_{t+1}) \leq L(w_t)$ . If this holds with equality, then  $w_{t+1} = w_t$  is an optimal solution at the  $(t+1)$ th iteration, but since it lies in the interior of  $\mathcal{O}_G(v_{t+1})$ , we have  $\|w_{t+1}\|_{Gv_{t+1}} < 1$  and the algorithm will terminate. Therefore we must have  $L(w_{t+1}) < L(w_t)$  for the algorithm to proceed.
